# Supplementary material for: Combination of Peri-Tumoral and Intra-Tumoral Radiomic Features on Bi-Parametric MRI Accurately Stratifies Prostate Cancer Risk: A Multi-Site Study
Source: PubMed Central journal article supplement (PMC7465024; doi:10.3390/cancers12082200), 2020-08-06
Supplement: cancers-12-02200-s001.pdf [file cancers-12-02200-s001.pdf]

Supplementary Materials

# Combination of Peri-Tumoral and Intra-Tumoral Radiomic Features on Bi-Parametric MRI Accurately Stratifies Prostate Cancer Risk: A Multi-Site Study

Ahmad Algohary, Rakesh Shiradkar, Shivani Pahwa, Andrei Purysko, Sadhna Verma, Daniel Moses, Ronald Shnier, Anne-Maree Haynes, Warick Delprado, James Thompson, Sreeharsha Tirumani, Amr Mahran, Ardeshir R Rastinehad, Lee Ponsky, Phillip D. Stricker and Anant Madabhushi

**Table S1.** Top 10 Intra- and Peri-tumoral radiomic features from T2-weighted images and ADC maps, in Low-vs.-High setting (D1,  $n = 151$ ).

| L-H | Intra-tumoral                  | Peri-Tumoral                    |                                |                                 |                                |                                |
|-----|--------------------------------|---------------------------------|--------------------------------|---------------------------------|--------------------------------|--------------------------------|
|     |                                | 0–3 mm                          | 3–6 mm                         | 6–9 mm                          | 9–12 mm                        | All                            |
| ADC | Gabor 3 0 kurtosis             | Gabor 5 0 mean                  | Haralick SumAve 1 64 mean      | Haralick SumAve 1 64 mean       | Range 2 kurtosis               | Laws 7 kurtosis                |
|     | Haralick SumAve 1 64 mean      | Haralick SumAve 1 64 skewness   | Haralick SumAve 1 64 skewness  | Laws 24 std                     | Haralick SumAve 1 64 skewness  | Haralick SumAve 1 64 mean      |
|     | Haralick SumVar 1 64 skewness  | Haralick SumAve 1 64 mean       | Gabor 5 0 skewness             | Range 2 kurtosis                | Haralick Energy 1 64 kurtosis  | Gabor 5 0 mean                 |
|     | Gabor 5 0 mean                 | Mean 1 skewness                 | Mean 1 skewness                | Haralick Energy 1 64 std        | Laws 2 kurtosis                | Haralick DiffAve 1 64 kurtosis |
|     | Laws 7 kurtosis                | Gabor 5 mean                    | Gabor 3 0 skewness             | Haralick Intertia 1 64 kurtosis | Laws 4 kurtosis                | Gabor 5 0 kurtosis             |
|     | Mean 1 skewness                | Laws 1 mean                     | Gabor 5 skewness               | Haralick SumAve 1 64 skewness   | Laws 21 std                    | Haralick SumAve 1 64 mean      |
|     | Haralick DiffVar 1 64 kurtosis | Laws 1 skewness                 | Laws 1 skewness                | Laws 4 kurtosis                 | Haralick Intertia 1 64 mean    | Gabor 5 0 skewness             |
|     | Laws 2 kurtosis                | Gabor 5 1p mean                 | Gabor 5 1p skewness            | Haralick SumVar 1 64 kurtosis   | Range 1 kurtosis               | Laws 6 kurtosis                |
|     | Haralick Energy 1 64 std       | Gabor 5 18 mean                 | Gabor 3 skewness               | Laws 6 kurtosis                 | Laws 5 std                     | Laws 2 kurtosis                |
|     | Gabor 3 kurtosis               | Gabor 5 0 skewness              | Gabor 5 18 skewness            | Haralick Entropy 1 64 std       | Haralick SumEnt 1 64 std       | Mean 1 kurtosis                |
| T2  | Mean 2 skewness                | Mean 2 mean                     | Laws 19 mean                   | Haralick Correlation 1 64 mean  | Mean 2 skewness                | Gabor 3 0 skewness             |
|     | Haralick SumEnt 1 64 std       | Collage DiffVar 1 skewness      | Haralick Correlation 1 64 mean | Haralick DiffEnt 1 64 skewness  | Collage DiffVar 1 kurtosis     | Haralick SumVar 1 64 kurtosis  |
|     | Gabor 5 0 mean                 | Laws 25 std                     | Haralick DiffEnt 1 64 skewness | Laws 3 mean                     | Haralick Correlation 1 64 mean | Mean 1 kurtosis                |
|     | Laws 6 kurtosis                | Haralick Intertia 1 64 skewness | Collage SumVar 1 std           | Haralick SumAve 1 64 mean       | Laws 5 skewness                | Haralick SumAve 1 64 mean      |

|                           |                                |                                    |                                    |                                    |                               |
|---------------------------|--------------------------------|------------------------------------|------------------------------------|------------------------------------|-------------------------------|
| Gabor 5 0 kurtosis        | Collage DiffVar 1 mean         | Haralick Correlation 1 64 std      | Haralick InDiffMom 1 64 mean       | Haralick SumAve 1 64 skewness      | Gabor 5 0 mean                |
| Haralick Entropy 1 64 std | Collage DiffAve 1 kurtosis     | Haralick Correlation 1 64 skewness | Haralick Correlation 1 64 skewness | Laws 13 skewness                   | Gabor 5 0 kurtosis            |
| Gabor 3 0 skewness        | Haralick Correlation 1 64 mean | Haralick InDiffMom 1 64 mean       | LoG kurtosis                       | Haralick Correlation 1 64 std      | Mean 2 skewness               |
| Gabor 5 mean              | Gabor 5 0 mean                 | Collage Intertia 1 std             | Haralick Entropy 1 64 kurtosis     | Mean 1 skewness                    | Laws 6 kurtosis               |
| Gabor 3 skewness          | Collage Intertia 1 mean        | Collage DiffVar 1 std              | Range 2 skewness                   | Haralick Correlation 1 64 skewness | Haralick SumEnt 1 64 skewness |
| Gabor 5 kurtosis          | Haralick DiffVar 1 64 kurtosis | Haralick InDiffMom 1 64 skewness   | Haralick Entropy 1 64 skewness     | Gabor 3 0 skewness                 | Gabor 3 skewness              |

**Table S2.** Top 10 Intra- and Peri-tumoral radiomic features from T2-weighted images and ADC maps, in Low-vs.-(Intermediate + High) setting (D1, n = 151).

| L-A | Intra-tumoral                  | Peri-Tumoral                   |                                |                                  |                                |                               |
|-----|--------------------------------|--------------------------------|--------------------------------|----------------------------------|--------------------------------|-------------------------------|
|     |                                | 0–3 mm                         | 3–6 mm                         | 6–9 mm                           | 9–12 mm                        | All                           |
| ADC | Mean 1 mean                    | Mean 1 mean                    | Collage DiffEnt 1 mean         | Laws 21 std                      | Laws 22 std                    | Laws 1 skewness               |
|     | Gabor 3 0 skewness             | Collage DiffVar 1 std          | Haralick SumAve 1 64 mean      | Laws 10 std                      | Collage Intertia 1 skewness    | Mean 2 mean                   |
|     | Mean 2 mean                    | Haralick SumAve 1 64 mean      | Collage Entropy 1 std          | Collage DiffEnt 1 mean           | Laws 10 std                    | Gabor 3 0 skewness            |
|     | Haralick SumAve 1 64 mean      | Collage DiffAve 1 std          | Mean 2 skewness                | Laws 15 std                      | Laws 16 std                    | Haralick SumAve 1 64 mean     |
|     | Mean 2 skewness                | Laws 1 mean                    | Collage InDiffMom 1 std        | Haralick Entropy 1 64 std        | Collage DiffAve 1 mean         | Mean 1 skewness               |
|     | Gabor 5 0 skewness             | Mean 2 mean                    | Collage SumVar 1 mean          | Laws 22 std                      | Laws 20 std                    | Mean 1 mean                   |
|     | Gabor 3 skewness               | Collage Intertia 1 std         | Mean 1 mean                    | Laws 20 std                      | Canny skewness                 | Gabor 3 skewness              |
|     | Gabor 3 skewness               | Gabor 3 0 mean                 | Collage SumEnt 1 mean          | Laws 23 std                      | Laws 23 std                    | Gabor 3 skewness              |
|     | Gabor 3 18 skewness            | Gabor 3 mean                   | Collage DiffAve 1 mean         | Collage Intertia 1 mean          | Laws 2 kurtosis                | Gabor 3 18 skewness           |
|     | Gabor 3 24 skewness            | Gabor 3 mean                   | Haralick SumAve 1 64 skewness  | Laws 10 mean                     | Laws 18 std                    | Gabor 3 24 skewness           |
| T2  | Mean 2 mean                    | Mean 2 mean                    | Laws 22 std                    | Haralick Correlation 1 64 mean   | Laws 24 std                    | Mean 2 mean                   |
|     | Laws 1 kurtosis                | Haralick Correlation 1 64 mean | Collage Intertia 1 kurtosis    | Laws 9 mean                      | Mean 1 skewness                | Mean 2 kurtosis               |
|     | Laws 6 kurtosis                | Haralick Correlation 1 64 std  | Laws 2 mean                    | Haralick Correlation 1 64 std    | Collage DiffAve 1 skewness     | Haralick Correlation 1 64 std |
|     | Mean 1 mean                    | Haralick DiffVar 1 64 kurtosis | Laws 21 std                    | Haralick InDiffMom 1 64 skewness | Collage DiffVar 1 kurtosis     | Laws 6 kurtosis               |
|     | Haralick DiffVar 1 64 kurtosis | Collage DiffAve 1 mean         | Mean 1 mean                    | Laws 3 mean                      | Range 2 std                    | Laws 1 kurtosis               |
|     | Mean 2 kurtosis                | Mean 1 mean                    | Haralick Correlation 1 64 mean | Collage DiffEnt 1 skewness       | Haralick Correlation 1 64 mean | Mean 2 mean                   |

|                                 |                                 |                               |                                    |                               |                                 |
|---------------------------------|---------------------------------|-------------------------------|------------------------------------|-------------------------------|---------------------------------|
| Haralick DiffVar 1 64 skewness  | Haralick Intertia 1 64 skewness | Laws 23 std                   | Haralick SumAve 1 64 mean          | Laws 21 std                   | Haralick Intertia 1 64 kurtosis |
| Gabor 3 0 skewness              | Collage SumVar 1 mean           | Collage Intertia 1 mean       | Haralick Correlation 1 64 skewness | Laws 5 skewness               | Mean 1 mean                     |
| Gabor 3 0 kurtosis              | Collage SumVar 1 kurtosis       | Haralick Energy 1 64 kurtosis | Collage InfoMes2 1 kurtosis        | Laws 22 std                   | Gabor 3 0 kurtosis              |
| Haralick Intertia 1 64 kurtosis | Gabor 5 0 mean                  | Mean 2 mean                   | Haralick SumEnt 1 64 skewness      | Haralick Correlation 1 64 std | Gabor 3 0 skewness              |

**Table S3.** Radiomic features in various peri-tumoral regions of the prostate along with corresponding percentage of epithelium, lumen, and stroma on histopathology for low-, intermediate-, and high-risk patients as defined by D'Amico risk classification system.

| Region                     | Low-risk |         |      |      | Intermediate-risk |         |      |      | High-risk |         |      |      |
|----------------------------|----------|---------|------|------|-------------------|---------|------|------|-----------|---------|------|------|
|                            | IT       | PT (mm) |      |      | IT                | PT (mm) |      |      | IT        | PT (mm) |      |      |
|                            | Lesion   | 3–6     | 6–9  | 9–12 | Lesion            | 3–6     | 6–9  | 9–12 | Lesion    | 3–6     | 6–9  | 9–12 |
| % epithelium               | 0.30     | 0.12    | 0.17 | 0.09 | 0.43              | 0.13    | 0.16 | 0.10 | 0.63      | 0.18    | 0.19 | 0.13 |
| % lumen                    | 0.20     | 0.18    | 0.19 | 0.20 | 0.17              | 0.14    | 0.21 | 0.24 | 0.09      | 0.29    | 0.27 | 0.23 |
| % stroma                   | 0.50     | 0.71    | 0.64 | 0.70 | 0.40              | 0.73    | 0.63 | 0.66 | 0.28      | 0.52    | 0.53 | 0.64 |
| Gabor (T2w)                | 0.45     |         |      |      | 0.48              |         |      |      | 0.71      |         |      |      |
| Haralick Sum Entropy (T2w) |          | 0.23    |      |      |                   | 0.34    |      |      |           | 0.66    |      |      |
| CoLIAGe Entropy (T2w)      |          |         | 0.18 |      |                   |         | 0.23 |      |           |         | 0.58 |      |
| Haralick Info Meas. (T2w)  |          |         |      | 0.32 |                   |         |      | 0.31 |           |         |      | 0.63 |

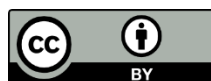

© 2020 by the authors. Licensee MDPI, Basel, Switzerland. This article is an open access article distributed under the terms and conditions of the Creative Commons Attribution (CC BY) license (<http://creativecommons.org/licenses/by/4.0/>).
